# Supplementary material for: The Commonly Used Bactericide Bismerthiazol Promotes Rice Defenses against Herbivores
Source: MDPI journal article supplement (doi:10.3390/ijms19051271), 2018-04-24
Supplement: s1 [file s1]

# Supplementary Materials: The Commonly Used Bactericide Bismethiazol Promotes Rice Defenses against Herbivores

Pengyong Zhou, Xiaochang Mo, Wanwan Wang, Xia Cheng and Yonggen Lou

Table S1. Primers and probes used for QRT-PCR of target genes.

| Gene          | RGAP ID    | Primer (5'-3')            | Probe (5'-3')                 |
|---------------|------------|---------------------------|-------------------------------|
| <i>OsACT</i>  | Os03g50885 | F: TGGACAGGTTATCACCATTGGT | CGTTTCCGCTGCCCTGAGGTCC        |
|               |            | R: CCGCAGCTTCCATTCCTATG   |                               |
| <i>OsAOS1</i> | Os03g55800 | F: CGAGCTCTTCCTCCGATACG   | ACCTCCACGCTCGGCTCATCTGTC      |
|               |            | R: GTCAGAAGGTGGCCTTCTTGAG |                               |
| <i>OsAOS2</i> | Os03g12500 | F: GCGCACGGGCTATTTTC      | CGAGTAGTTAGGCGTCCAAAGTTTCGGGA |
|               |            | R: CGATCACCGTTCACGATGAA   |                               |

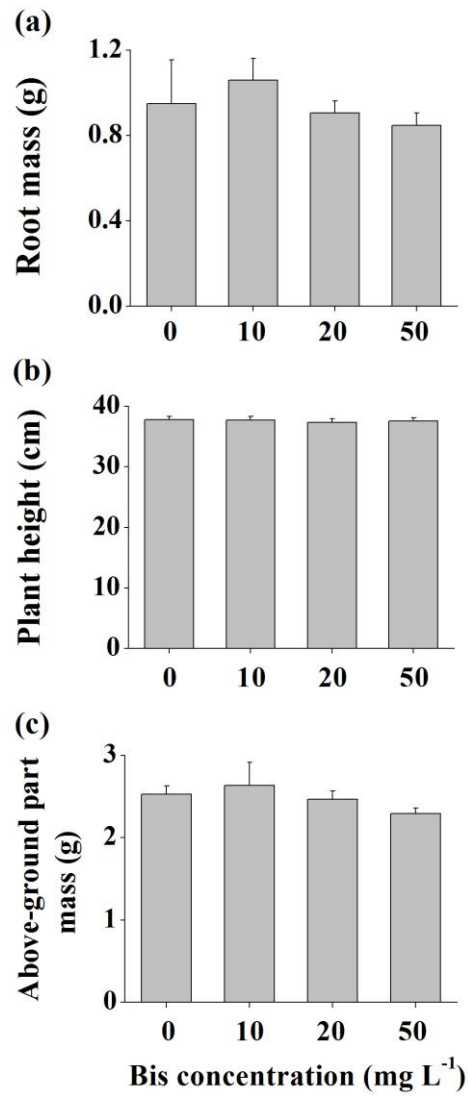

**Figure S1.** Growth phenotypes of bismethiazol-treated and control rice plants. Mean root mass (a), plant height (b) and above-ground part mass (c) (+ SE,  $n = 6$ ) of rice plants that had been grown in nutrient solution with different concentrations of bismethiazol for 10 days.

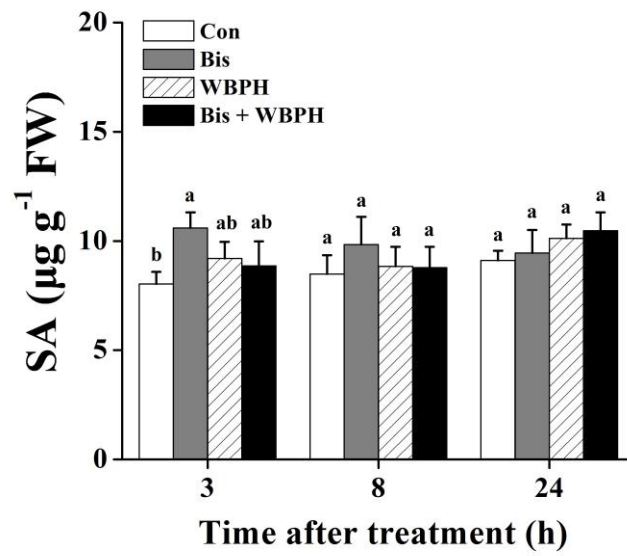

**Figure S2.** Mean levels (+ SE,  $n = 5$ ) of SA in leaf sheaths of rice plants with different treatments. Con, control plants; Bis, bismethiazol-treated plants; WBPH, WBPH-infested plants; Bis + WBPH, bismethiazol + WBPH-treated plants. These treatment methods are described in Materials and Methods. Letters indicate significant differences between different treatments ( $p < 0.05$ , Duncan's multiple-range test).

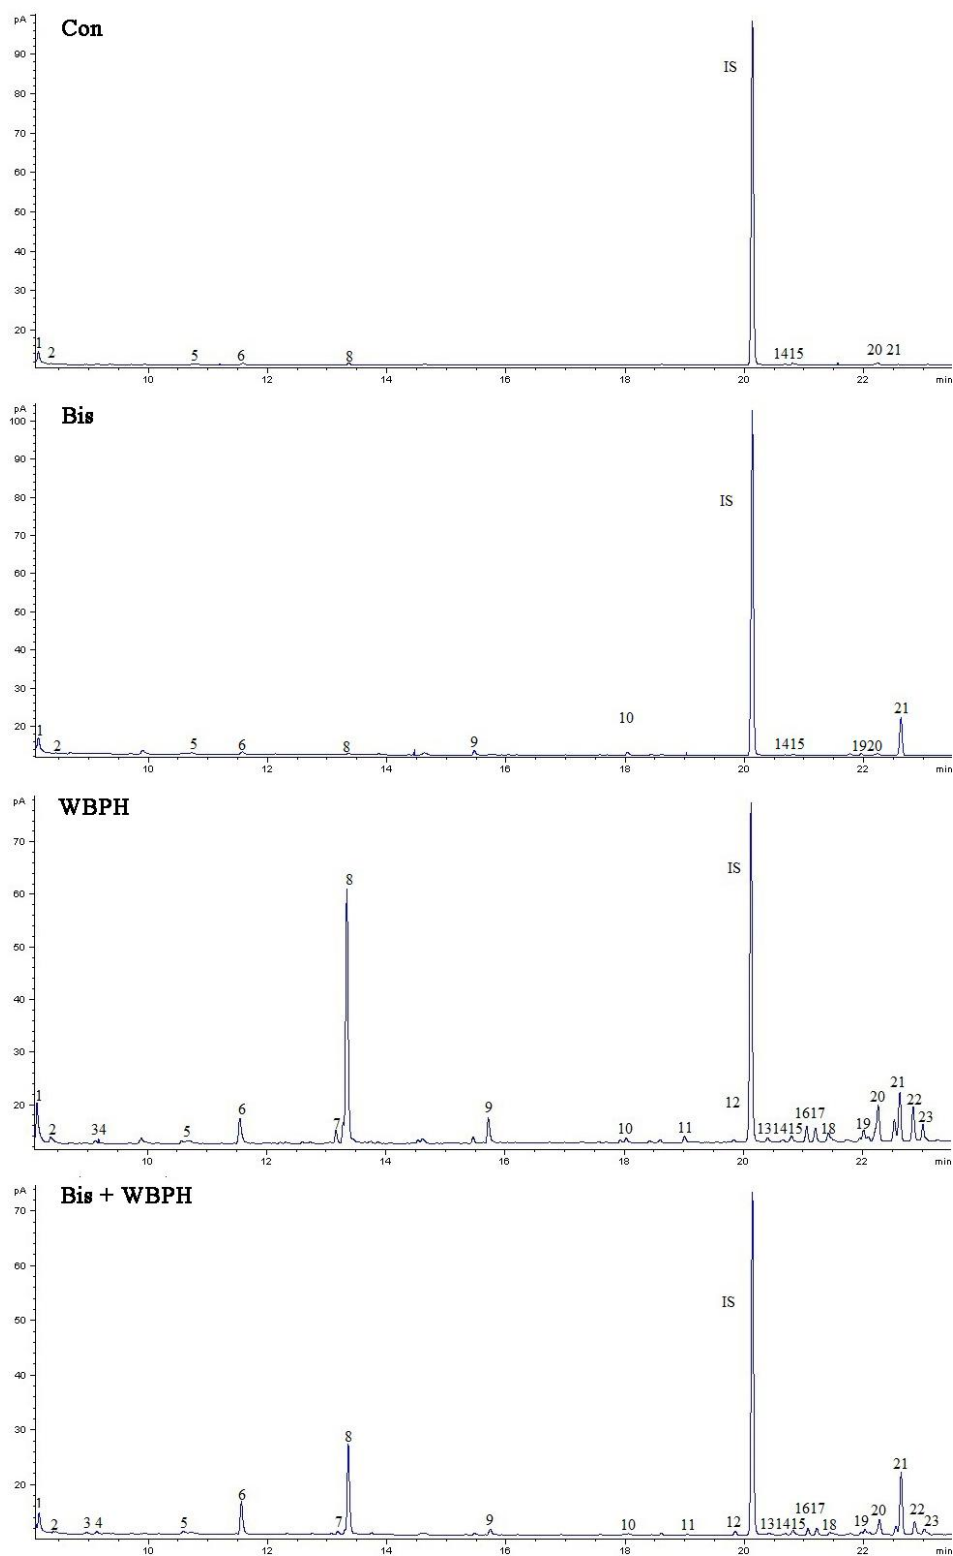

**Figure S3.** Typical chromatograms obtained by head space collections from plants with different treatments. Con, control plants; Bis, bismethiazol-treated plants; WBPH, WBPH-infested plants; Bis + WBPH, bismethiazol + WBPH-treated plants. These treatment methods are described in Materials and Methods. Numbers represent chemicals that are the same as in Table 1.
